# Supplementary material
Source: publisher figshare collection journal article supplement (https://acs.figshare.com/ndownloader/files/3766294)
Supplement: Supplementary file 1 [file 3766294]

## **Border Control in Hepatitis C Virus Infection: Inhibiting Viral Entry**

Cameron J. Schweitzer\* and T. Jake Liang

Table S1

2 pages

**Table S1. Summary of anti-HCV entry inhibitors**

|                       | Example Compounds                                     | Advantages                                                    | Disadvantages                                                              | Stage               |
|-----------------------|-------------------------------------------------------|---------------------------------------------------------------|----------------------------------------------------------------------------|---------------------|
| HCV targeting         | AbXTL68<br>Civacir                                    | Target HCV<br>Neutralize virus prior to entry                 | Escape mutants<br>Cannot block cell-cell transmission<br>Genotype specific | Phase II/III        |
| Host targeting        | Anti-CD81<br>Anti –SR-BI<br>Anti-claudin-1<br>ITX5061 | High potency (except ITX5061)<br>Block cell-cell transmission | Off-target and unwanted side effects                                       | Mouse model/Phase I |
| Pathway inhibitors    | Ezetimibe<br>Erlotinib/Dasatinib                      | Block cell-cell transmission                                  | Low potency<br>Unwanted side effects                                       | Mouse model         |
| Novel small molecules | Chlorcyclizine                                        | High potency<br>Safety                                        | Unknown mechanism of action                                                | Preclinical         |
